# Supplementary material
Source: publisher figshare collection journal article supplement (https://gsajournals.figshare.com/ndownloader/files/17706185)
Supplement: Supplementary file 1 [file 17706185]

Cycle	# of individuals	# of families	Proportion missing data	Average pairwise diversity	Average heterozygosity observed	Average # of SNPs per family	Standard Deviation of SNPs per family
C0	21	NA	0.0471	0.3312	0.0372	NA	NA
C1	1872	78	0.0064	0.3025	0.0777	142.86	37.49
C2	1904	80	0.0033	0.3027	0.1505	132.94	38.56
C3	1439	60	0.0789	0.3248	0.1502	145.38	27.9
